# Supplementary material for: Progress in the study of genome size evolution in Asteraceae: analysis of the last update
Source: Oxford University Press journal article supplement (doi:10.1093/database/baz098), 2019-01-01
Supplement: fig_s2_database_baz098.pdf [file fig_s2_database_baz098.pdf]

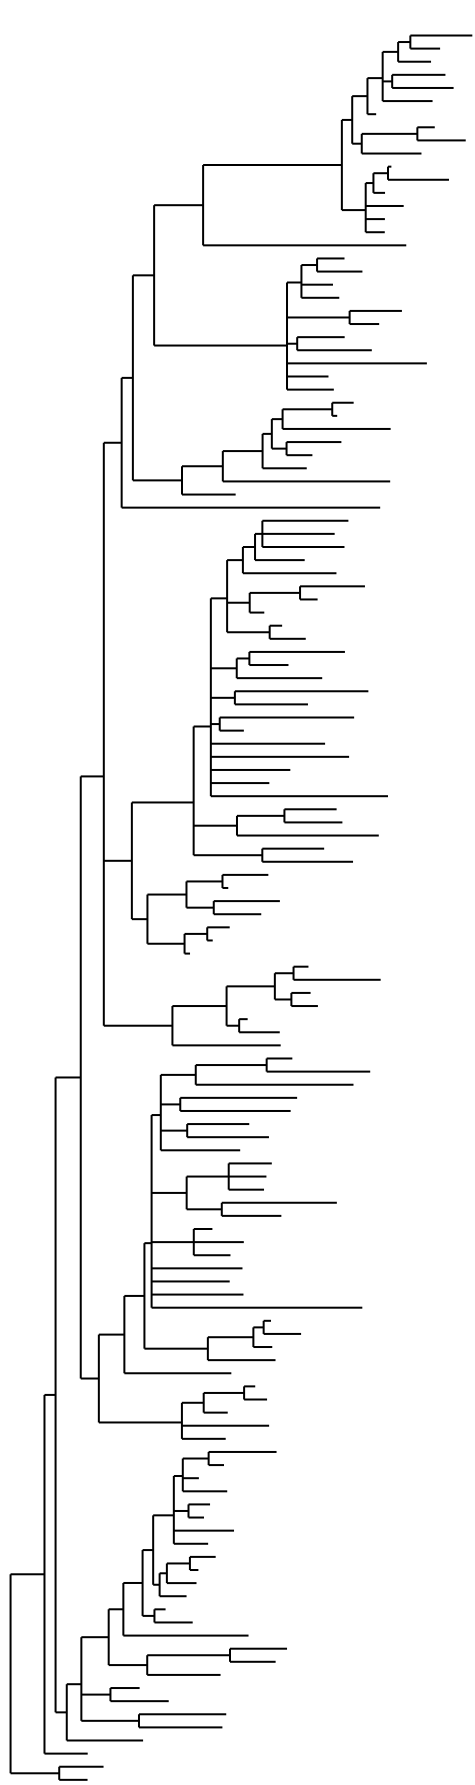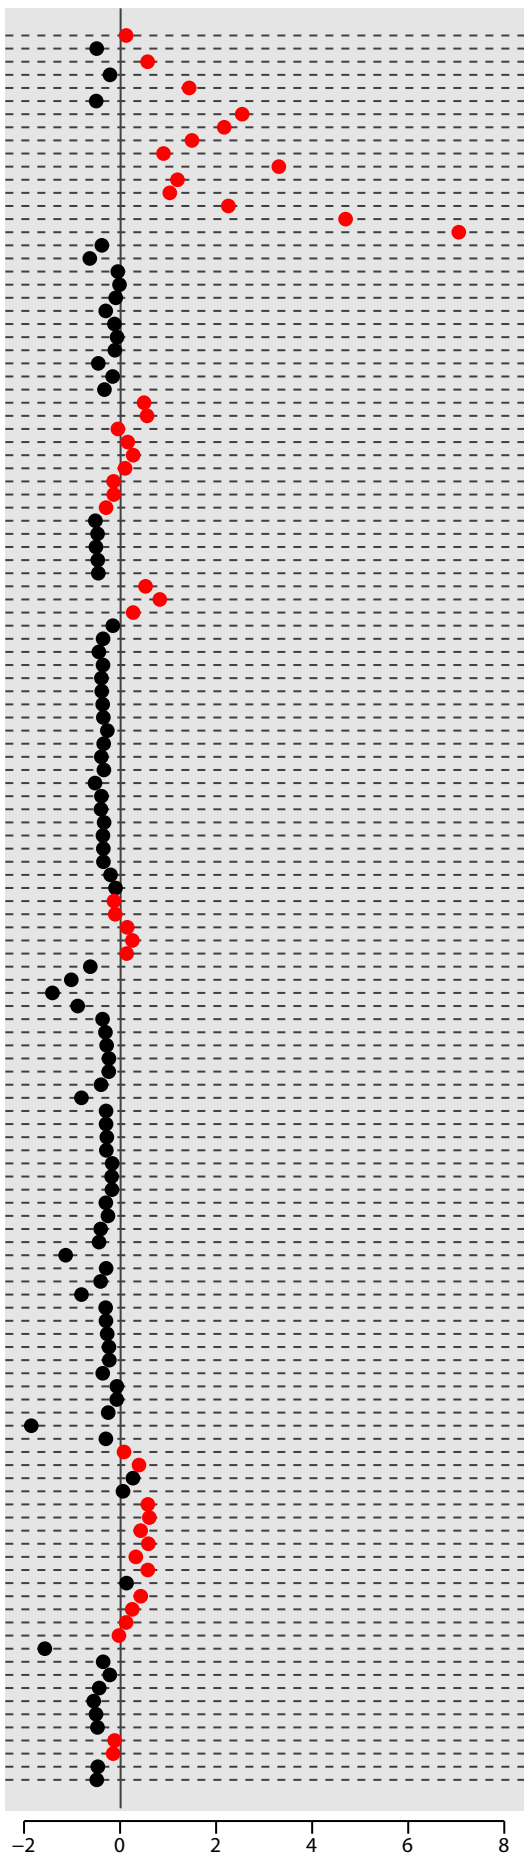

- Cota*
- Tripleurospermum*
- Tanacetum*
- Achillea*
- Anacyclus*
- Matricaria*
- Gonospermum*
- Argyranthemum*
- Glebionis*
- Chamaemelum*
- Ajania*
- Chrysanthemum*
- Artemisia*
- Cantabria*
- Kaschgaria*
- Leucanthemella*
- Cotula*
- Symphotrichum*
- Tripolium*
- Solidago*
- Machaeranthera*
- Bellis*
- Bellium*
- Brachyscome*
- Erigeron*
- Aster*
- Conyza*
- Baccharis*
- Bombycilaena*
- Gamochaeta*
- Craspedia*
- Filago*
- Logfia*
- Leontopodium*
- Ifloga*
- Phagnalon*
- Galendula*
- Zinnia*
- Iva*
- Xanthium*
- Ambrosia*
- Parthenium*
- Lindheimeria*
- Silphium*
- Engelmannia*
- Rudbeckia*
- Ratibida*
- Ageratum*
- Eupatorium*
- Liatris*
- Melampodium*
- Palatxia*
- Polymnia*
- Tetragonotheca*
- Eclipta*
- Galinsoga*
- AGuizotia*
- Ageratina*
- Silycadenia*
- Gallardia*
- Helenium*
- Hymenoxys*
- Coreopsis*
- Cosmos*
- Inula*
- Telekia*
- Jasonia*
- Pallenis*
- Schizogyne*
- Vieraea*
- Altagoappus*
- Delairea*
- Kleinia*
- Lasiocephalus*
- Senecio*
- Petasites*
- Tussilago*
- Syneilesis*
- Lapsana*
- Rhagadiolus*
- Crepis*
- Askellia*
- Taraxacum*
- Reichardia*
- Sonchus*
- Yungia*
- Helminthotheca*
- Leontodon*
- Picris*
- Hypochoeris*
- Scorzoneroides*
- Agoseris*
- Micoseris*
- Phalacroseris*
- Krigia*
- Lactuca*
- Cyrtopappus*
- Toipis*
- Hieracium*
- Pilosella*
- Andryala*
- Urospermum*
- Tragopogon*
- Lessingianthus*
- Vernonia*
- Vernonanthura*
- Stokesia*
- Chrysolaina*
- Carthamus*
- Centaura*
- Klasea*
- Myopordon*
- Rhaponiticum*
- Oligochaeta*
- Calicephalus*
- Cheirolophus*
- Cirsium*
- Silybum*
- Ptilostemon*
- Cynara*
- Onopordum*
- Olgaea*
- Staezelina*
- Siebera*
- Xeranthemum*
- Chardnia*
- Acantholepis*
- Echinops*
- Atractylis*
- Carlina*
- Ainsliaea*
- Gochnatia*
- Dasyphyllum*
- Fulcaldea*

Local Moran's I for GS values
