# Supplementary material for: Progress in the study of genome size evolution in Asteraceae: analysis of the last update
Source: Oxford University Press journal article supplement (doi:10.1093/database/baz098), 2019-01-01
Supplement: fig_s5_database_baz098.pdf [file fig_s5_database_baz098.pdf]

Ancestral 2C/2n values (pg/chromosome) inferred:

- \* Asteraceae: 0.277
- A Asteroideae: 0.214
  - A1 Anthemideae: 0.343
  - A2 Astereae: 0.321
  - A3 Gnaphalieae: 0.150
  - A4 Heliantheae All.: 0.231
  - A5 Inuleae: 0.155
  - A6 Senecioneae: 0.094
- B Cichorioideae: 0.315
- C Carduoideae: 0.258

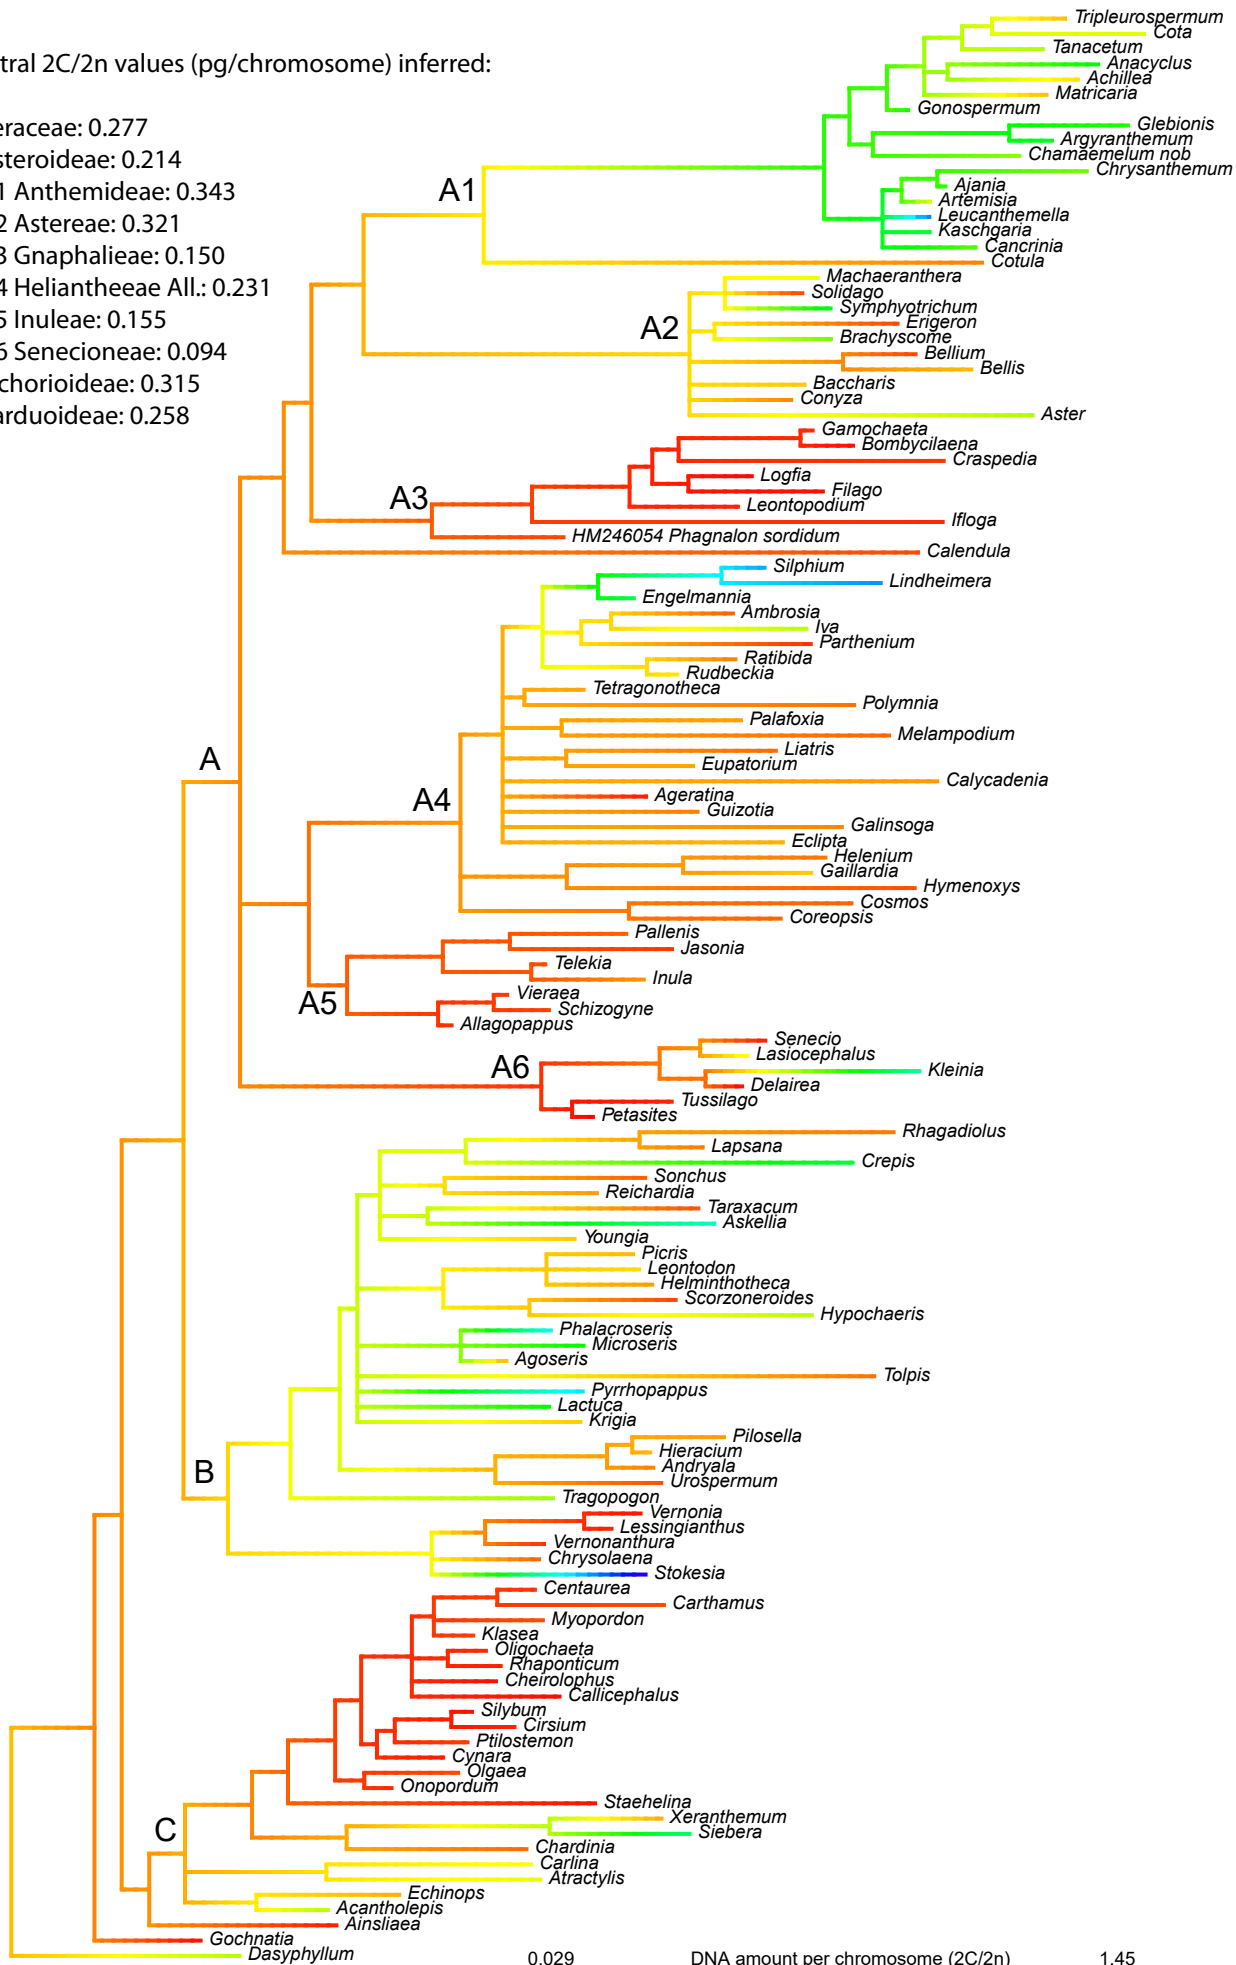

0.029 DNA amount per chromosome (2C/2n) 1.45  
length=0.03
