# Supplementary material for: Progress in the study of genome size evolution in Asteraceae: analysis of the last update
Source: Oxford University Press journal article supplement (doi:10.1093/database/baz098), 2019-01-01

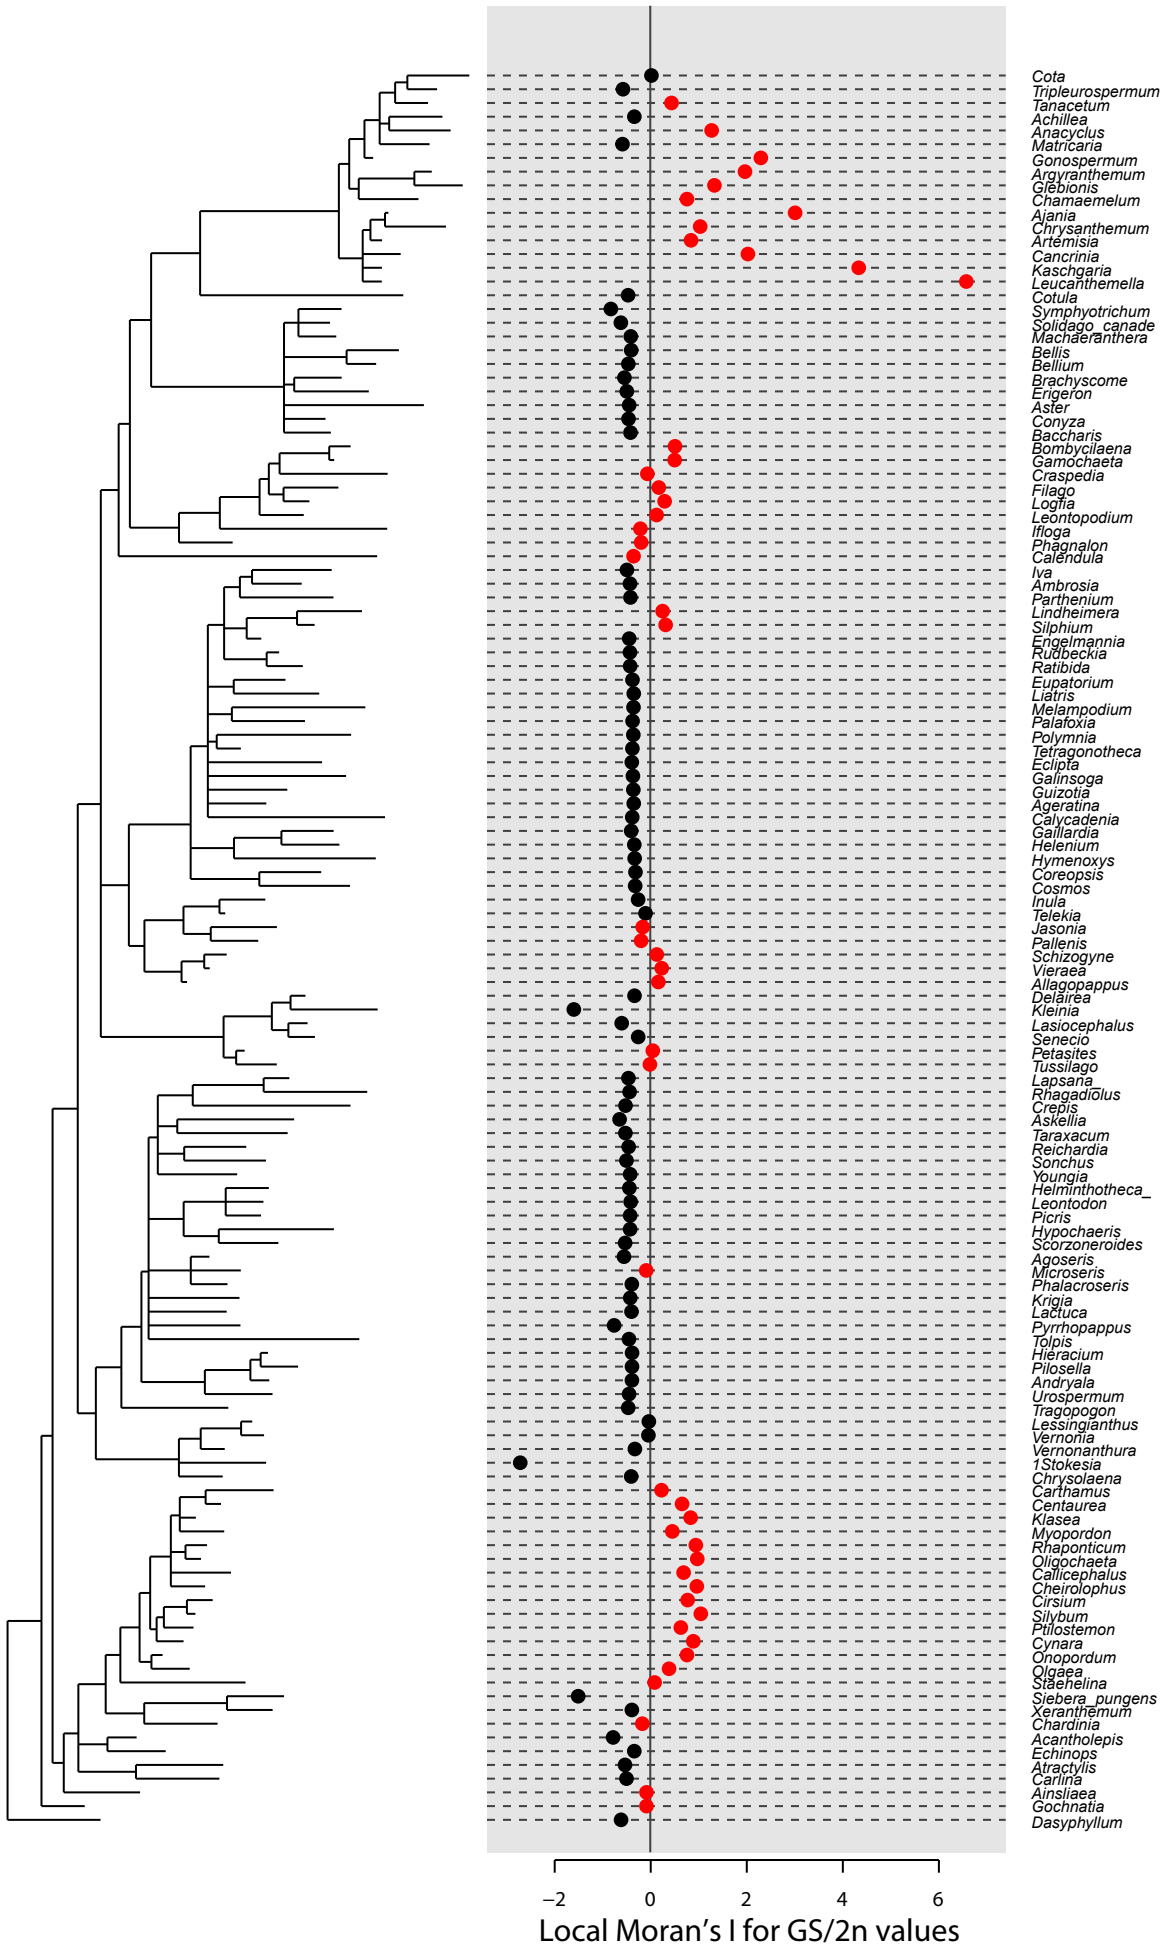

Supplement: fig_s6_database_baz098.pdf [file fig_s6_database_baz098.pdf]
